# Supplementary material for: Daily rhythms of behavioral and hormonal patterns in male dromedary camels housed in boxes
Source: PeerJ. 2017 Mar 29;5:e3074. doi: 10.7717/peerj.3074 (PMC5374969; doi:10.7717/peerj.3074)
Supplement: Data S1 [file peerj-05-3074-s004.xlsx]

## Sheet: States
Camel	Day	Hour	Feeding	Walking	Lying down	Rumination	Stereotypy	STANDING	Total
3	1	1	0	0	454	327	0	419	1200
3	1	3	0	0	1200	0	0	0	1200
3	1	5	0	0	1200	0	0	0	1200
3	1	7	59	0	0	608	0	533	1200
3	1	9	1200	0	0	0	0	0	1200
3	1	11	697	0	0	0	0	503	1200
3	1	13	0	136.364	0	0	0	1063.64	1200
3	1	15	1200	0	0	0	0	0	1200
3	1	17	0	0	1200	0	0	0	1200
3	1	19	307.795	10.0587	573.345	0	0	308.801	1200
3	1	21	0	0	1046	154	0	0	1200
3	1	23	0	0	1200	0	0	0	1200
373	1	1	0	0	1200	0	0	0	1200
373	1	3	0	0	1200	0	0	0	1200
373	1	5	0	0	1077	123	0	0	1200
373	1	7	0	0	457	632	0	111	1200
373	1	9	1170	0	0	0	0	30	1200
373	1	11	376	0	0	61	13	750	1200
373	1	13	813	10	0	0	170	207	1200
373	1	15	531	0	0	0	0	669	1200
373	1	17	13	0	823	0	0	364	1200
373	1	19	0	0	1200	0	0	0	1200
373	1	21	0	0	1200	0	0	0	1200
373	1	23	0	0	1200	0	0	0	1200
504	1	1	0	0	908	292	0	0	1200
504	1	3	0	0	530	670	0	0	1200
504	1	5	0	0	145	1055	0	0	1200
504	1	7	94	86	0	0	947	73	1200
504	1	9	333	143	0	0	93	631	1200
504	1	11	451	111	0	0	348	290	1200
504	1	13	140	25	0	0	273	762	1200
504	1	15	551	152	0	0	325	172	1200
504	1	17	398	20	0	0	520	262	1200
504	1	19	0	0	1200	0	0	0	1200
504	1	21	0	0	1200	0	0	0	1200
504	1	23	0	0	1200	0	0	0	1200
514	1	1	0	0	525	675	0	0	1200
514	1	3	0	102	0	0	1054	44	1200
514	1	5	0	0	1200	0	0	0	1200
514	1	7	377	79	0	0	721	23	1200
514	1	9	62	232	0	0	761	145	1200
514	1	11	216	155	39	0	435	355	1200
514	1	13	0	176	0	488	39	497	1200
514	1	15	161	139	0	0	709	191	1200
514	1	17	186	92	0	0	885	37	1200
514	1	19	0	34	50	979	0	137	1200
514	1	21	0	0	1200	0	0	0	1200
514	1	23	0	0	1200	0	0	0	1200
515	1	1	0	0	529	671	0	0	1200
515	1	3	0	0	1180	20	0	0	1200
515	1	5	0	0	0	1200	0	0	1200
515	1	7	39	7	0	50	959	145	1200
515	1	9	42	63	0	0	848	247	1200
515	1	11	124	70	0	0	946	60	1200
515	1	13	101.136	43.1818	0	0	773.864	281.818	1200
515	1	15	0	23	0	0	1120	57	1200
515	1	17	0	16	0	0	1126	58	1200
515	1	19	44	0	0	0	1156	0	1200
515	1	21	0	0	1200	0	0	0	1200
515	1	23	0	0	1200	0	0	0	1200
808	1	1	0	0	1200	0	0	0	1200
808	1	3	0	0	1200	0	0	0	1200
808	1	5	0	0	1200	0	0	0	1200
808	1	7	0	0	792	408	0	0	1200
808	1	9	1200	0	0	0	0	0	1200
808	1	11	222	0	978	0	0	0	1200
808	1	13	268.913	0	634.878	0	0	296.209	1200
808	1	15	784.81	0	0	0	317.975	97.2152	1200
808	1	17	0	0	674	0	0	526	1200
808	1	19	0	0	1200	0	0	0	1200
808	1	21	0	0	1163	37	0	0	1200
808	1	23	0	0	1200	0	0	0	1200
3	2	1	0	0	855	345	0	0	1200
3	2	3	0	0	937	263	0	0	1200
3	2	5	0	0	0	1200	0	0	1200
3	2	7	335	0	0	570	0	295	1200
3	2	9	1086	0	0	54	0	60	1200
3	2	11	0	0	1200	0	0	0	1200
3	2	13	1200	0	0	0	0	0	1200
3	2	15	23.2911	60.7595	170.127	0	0	945.823	1200
3	2	17	0	0	1200	0	0	0	1200
3	2	19	0	0	1200	0	0	0	1200
3	2	21	0	0	1200	0	0	0	1200
3	2	23	0	0	1200	0	0	0	1200
373	2	1	0	0	1200	0	0	0	1200
373	2	3	0	0	1123	77	0	0	1200
373	2	5	0	0	1138	62	0	0	1200
373	2	7	0	0	1028	172	0	0	1200
373	2	9	1200	0	0	0	0	0	1200
373	2	11	593	0	429	0	0	178	1200
373	2	13	1200	0	0	0	0	0	1200
373	2	15	730	0	162	0	0	308	1200
373	2	17	325	0	803	0	0	72	1200
373	2	19	0	0	1200	0	0	0	1200
373	2	21	0	0	1160	40	0	0	1200
373	2	23	0	0	1200	0	0	0	1200
504	2	1	0	0	295	905	0	0	1200
504	2	3	0	0	1200	0	0	0	1200
504	2	5	137	42	343	71	572	35	1200
504	2	7	171.429	71.1779	0	0	859.148	98.2456	1200
504	2	9	440	105	0	0	80	575	1200
504	2	11	47	24	0	897	52	180	1200
504	2	13	364	23	0	0	408	405	1200
504	2	15	223.559	75.188	0	0	452.13	449.123	1200
504	2	17	75	91	0	0	319	715	1200
504	2	19	0	0	1200	0	0	0	1200
504	2	21	0	0	1200	0	0	0	1200
504	2	23	0	0	1200	0	0	0	1200
514	2	1	217	122	0	0	91	770	1200
514	2	3	0	0	1200	0	0	0	1200
514	2	5	0	0	0	1200	0	0	1200
514	2	7	266	107	0	0	783	44	1200
514	2	9	158	79	0	0	577	386	1200
514	2	11	470.785	97.1619	0	0	466.778	165.275	1200
514	2	13	64	157	0	0	241	738	1200
514	2	15	50	82	0	0	658	410	1200
514	2	17	0	68	0	0	1057	75	1200
514	2	19	0	0	30	1170	0	0	1200
514	2	21	0	0	325	875	0	0	1200
514	2	23	0	0	0	1200	0	0	1200
515	2	1	0	0	66	844	100	190	1200
515	2	3	0	0	0	1200	0	0	1200
515	2	5	0	0	109	1091	0	0	1200
515	2	7	83	24	0	0	877	216	1200
515	2	9	185	88	0	0	737	190	1200
515	2	11	149	79	0	0	624	348	1200
515	2	13	0	85	0	0	52	1063	1200
515	2	15	148	45	0	0	961	46	1200
515	2	17	40	56	0	0	1016	88	1200
515	2	19	12	6	724	24	382	52	1200
515	2	21	0	0	984	216	0	0	1200
515	2	23	0	0	1200	0	0	0	1200
808	2	1	0	0	1180	20	0	0	1200
808	2	3	0	0	1200	0	0	0	1200
808	2	5	0	0	789	411	0	0	1200
808	2	7	682	0	62	264	0	192	1200
808	2	9	1200	0	0	0	0	0	1200
808	2	11	0	0	0	0	0	1200	1200
808	2	13	625.51	0	0	0	57.1429	517.347	1200
808	2	15	0	0	752	0	0	448	1200
808	2	17	0	0	1200	0	0	0	1200
808	2	19	0	0	1200	0	0	0	1200
808	2	23	0	0	539	661	0	0	1200
808	2	21	0	0	0	43	0	1157	1200

## Sheet: active VS inactive states
Camel	Day	Hour	active behaviors	inactive behaviors	Total
3	1	1	0	1200	1200
3	1	3	0	1200	1200
3	1	5	0	1200	1200
3	1	7	59	1141	1200
3	1	9	1200	0	1200
3	1	11	697	503	1200
3	1	13	136.364	1063.64	1200
3	1	15	1200	0	1200
3	1	17	0	1200	1200
3	1	19	317.854	882.146	1200
3	1	21	0	1200	1200
3	1	23	0	1200	1200
373	1	1	0	1200	1200
373	1	3	0	1200	1200
373	1	5	0	1200	1200
373	1	7	0	1200	1200
373	1	9	1170	30	1200
373	1	11	389	811	1200
373	1	13	993	207	1200
373	1	15	531	669	1200
373	1	17	13	1187	1200
373	1	19	0	1200	1200
373	1	21	0	1200	1200
373	1	23	0	1200	1200
504	1	1	0	1200	1200
504	1	3	0	1200	1200
504	1	5	0	1200	1200
504	1	7	1127	73	1200
504	1	9	569	631	1200
504	1	11	910	290	1200
504	1	13	438	762	1200
504	1	15	1028	172	1200
504	1	17	938	262	1200
504	1	19	0	1200	1200
504	1	21	0	1200	1200
504	1	23	0	1200	1200
514	1	1	0	1200	1200
514	1	3	1156	44	1200
514	1	5	0	1200	1200
514	1	7	1177	23	1200
514	1	9	1055	145	1200
514	1	11	806	394	1200
514	1	13	215	985	1200
514	1	15	1009	191	1200
514	1	17	1163	37	1200
514	1	19	34	1166	1200
514	1	21	0	1200	1200
514	1	23	0	1200	1200
515	1	1	0	1200	1200
515	1	3	0	1200	1200
515	1	5	0	1200	1200
515	1	7	1005	195	1200
515	1	9	953	247	1200
515	1	11	1150	50	1200
515	1	13	1059.09	140.909	1200
515	1	15	1187	13	1200
515	1	17	1142	58	1200
515	1	19	1200	0	1200
515	1	21	0	1200	1200
515	1	23	0	1200	1200
808	1	1	0	1200	1200
808	1	3	0	1200	1200
808	1	5	0	1200	1200
808	1	7	0	1200	1200
808	1	9	1200	0	1200
808	1	11	222	978	1200
808	1	13	268.913	931.087	1200
808	1	15	1102.78	97.2152	1200
808	1	17	0	1200	1200
808	1	19	0	1200	1200
808	1	21	0	1200	1200
808	1	23	0	1200	1200
3	2	1	0	1200	1200
3	2	3	0	1200	1200
3	2	5	0	1200	1200
3	2	7	335	865	1200
3	2	9	1086	114	1200
3	2	11	0	1200	1200
3	2	13	1200	0	1200
3	2	15	84.0506	1115.95	1200
3	2	17	0	1200	1200
3	2	19	0	1200	1200
3	2	21	0	1200	1200
3	2	23	0	1200	1200
373	2	1	0	1200	1200
373	2	3	0	1200	1200
373	2	5	0	1200	1200
373	2	7	0	1200	1200
373	2	9	1200	0	1200
373	2	11	593	607	1200
373	2	13	1200	0	1200
373	2	15	730	470	1200
373	2	17	325	875	1200
373	2	19	0	1200	1200
373	2	21	0	1200	1200
373	2	23	0	1200	1200
504	2	1	0	1200	1200
504	2	3	0	1200	1200
504	2	5	751	449	1200
504	2	7	1101.75	98.2456	1200
504	2	9	625	575	1200
504	2	11	123	1077	1200
504	2	13	795	405	1200
504	2	15	750.877	449.123	1200
504	2	17	485	715	1200
504	2	19	0	1200	1200
504	2	21	0	1200	1200
504	2	23	0	1200	1200
514	2	1	430	770	1200
514	2	3	0	1200	1200
514	2	5	0	1200	1200
514	2	7	1156	44	1200
514	2	9	814	386	1200
514	2	11	1034.72	165.275	1200
514	2	13	462	738	1200
514	2	15	790	410	1200
514	2	17	1125	75	1200
514	2	19	0	1200	1200
514	2	21	0	1200	1200
514	2	23	0	1200	1200
515	2	1	100	1100	1200
515	2	3	0	1200	1200
515	2	5	0	1200	1200
515	2	7	1064	136	1200
515	2	9	1022	178	1200
515	2	11	878	322	1200
515	2	13	262	938	1200
515	2	15	1154	46	1200
515	2	17	1143	57	1200
515	2	19	414	786	1200
515	2	21	0	1200	1200
515	2	23	0	1200	1200
808	2	1	0	1200	1200
808	2	3	0	1200	1200
808	2	5	0	1200	1200
808	2	7	682	518	1200
808	2	9	1200	0	1200
808	2	11	0	1200	1200
808	2	13	682.653	517.347	1200
808	2	15	0	1200	1200
808	2	17	0	1200	1200
808	2	19	0	1200	1200
808	2	23	0	1200	1200
808	2	21	0	1200	1200

## Sheet: stereotypy Duration
Camel	Day	Hour	balancing	Licking wall	box walking	Bar mouthing	total
3	1	1	0	0	0	0	0
3	1	3	0	0	0	0	0
3	1	5	0	0	0	0	0
3	1	7	0	0	0	0	0
3	1	9	0	0	0	0	0
3	1	11	0	0	0	0	0
3	1	13	0	0	0	0	0
3	1	15	0	0	0	0	0
3	1	17	0	0	0	0	0
3	1	19	0	0	0	0	0
3	1	21	0	0	0	0	0
3	1	23	0	0	0	0	0
373	1	1	0	0	0	0	0
373	1	3	0	0	0	0	0
373	1	5	0	0	0	0	0
373	1	7	0	0	0	0	0
373	1	9	0	0	0	0	0
373	1	11	0	0	0	13	13
373	1	13	0	0	170	0	170
373	1	15	0	0	0	0	0
373	1	17	0	0	0	0	0
373	1	19	0	0	0	0	0
373	1	21	0	0	0	0	0
373	1	23	0	0	0	0	0
504	1	1	0	0	0	0	0
504	1	3	0	0	0	0	0
504	1	5	0	0	0	0	0
504	1	7	0	947	0	0	947
504	1	9	0	93	0	0	93
504	1	11	0	348	0	0	348
504	1	13	0	273	0	0	273
504	1	15	0	311	14	0	325
504	1	17	0	520	0	0	520
504	1	19	0	0	0	0	0
504	1	21	0	0	0	0	0
504	1	23	0	0	0	0	0
514	1	1	0	0	0	0	0
514	1	3	0	943	111	0	1054
514	1	5	0	0	0	0	0
514	1	7	0	607	114	0	721
514	1	9	0	490	271	0	761
514	1	11	0	40	385	0	435
514	1	13	0	0	39	0	39
514	1	15	0	481	228	0	709
514	1	17	0	853	32	0	885
514	1	19	0	0	0	0	0
514	1	21	0	0	0	0	0
514	1	23	0	0	0	0	0
515	1	1	0	0	0	0	0
515	1	3	0	0	0	0	0
515	1	5	0	0	0	0	0
515	1	7	959	0	0	0	959
515	1	9	848	0	0	0	848
515	1	11	946	0	0	0	946
515	1	13	773.864	0	0	0	773.864
515	1	15	1120	0	0	0	1120
515	1	17	1126	0	0	0	1126
515	1	19	1156	0	0	0	1156
515	1	21	0	0	0	0	0
515	1	23	0	0	0	0	0
808	1	1	0	0	0	0	0
808	1	3	0	0	0	0	0
808	1	5	0	0	0	0	0
808	1	7	0	0	0	0	0
808	1	9	0	0	0	0	0
808	1	11	0	0	0	0	0
808	1	13	0	0	0	0	0
808	1	15	0	64.8101	0	253.165	317.975
808	1	17	0	0	0	0	0
808	1	19	0	0	0	0	0
808	1	21	0	0	0	0	0
808	1	23	0	0	0	0	0
3	2	1	0	0	0	0	0
3	2	3	0	0	0	0	0
3	2	5	0	0	0	0	0
3	2	7	0	0	0	0	0
3	2	9	0	0	0	0	0
3	2	11	0	0	0	0	0
3	2	13	0	0	0	0	0
3	2	15	0	0	0	0	0
3	2	17	0	0	0	0	0
3	2	19	0	0	0	0	0
3	2	21	0	0	0	0	0
3	2	23	0	0	0	0	0
373	2	1	0	0	0	0	0
373	2	3	0	0	0	0	0
373	2	5	0	0	0	0	0
373	2	7	0	0	0	0	0
373	2	9	0	0	0	0	0
373	2	11	0	0	0	0	0
373	2	13	0	0	0	0	0
373	2	15	0	0	0	0	0
373	2	17	0	0	0	0	0
373	2	19	0	0	0	0	0
373	2	21	0	0	0	0	0
373	2	23	0	0	0	0	0
504	2	1	0	0	0	0	0
504	2	3	0	0	0	0	0
504	2	5	0	572	0	0	572
504	2	7	0	835.088	24.0602	0	859.148
504	2	9	0	49	31	0	80
504	2	11	0	52	0	0	52
504	2	13	0	408	0	0	408
504	2	15	0	352.882	99.2481	0	452.13
504	2	17	0	194	125	0	319
504	2	19	0	0	0	0	0
504	2	21	0	0	0	0	0
504	2	23	0	0	0	0	0
514	2	1	0	0	91	0	91
514	2	3	0	0	0	0	0
514	2	5	0	0	0	0	0
514	2	7	0	740	43	0	783
514	2	9	0	335	242	0	577
514	2	11	0	466.778	0	0	466.778
514	2	13	0	241	0	0	241
514	2	15	0	285	373	0	658
514	2	17	0	831	226	0	1057
514	2	19	0	0	0	0	0
514	2	21	0	0	0	0	0
514	2	23	0	0	0	0	0
515	2	1	100	0	0	0	100
515	2	3	0	0	0	0	0
515	2	5	0	0	0	0	0
515	2	7	877	0	0	0	877
515	2	9	737	0	0	0	737
515	2	11	624	0	0	0	624
515	2	13	46	6	0	0	52
515	2	15	961	0	0	0	961
515	2	17	1016	0	0	0	1016
515	2	19	382	0	0	0	382
515	2	21	0	0	0	0	0
515	2	23	0	0	0	0	0
808	2	1	0	0	0	0	0
808	2	3	0	0	0	0	0
808	2	5	0	0	0	0	0
808	2	7	0	0	0	0	0
808	2	9	0	0	0	0	0
808	2	11	0	0	0	0	0
808	2	13	0	0	0	57.1429	57.1429
808	2	15	0	0	0	0	0
808	2	17	0	0	0	0	0
808	2	19	0	0	0	0	0
808	2	21	0	0	0	0	0
808	2	23	0	0	0	0	0

## Sheet: Stereotypy frequency
Camel	Day	Hour	Licking wall	box walking	Bar mouthing	head up	balancing	TOTAL
3	1	1	0	0	0	0	0	0
3	1	3	0	0	0	0	0	0
3	1	5	0	0	0	0	0	0
3	1	7	0	0	0	0	0	0
3	1	9	0	0	0	0	0	0
3	1	11	0	0	0	0	0	0
3	1	13	0	0	0	0	0	0
3	1	15	0	0	0	0	0	0
3	1	17	0	0	0	0	0	0
3	1	19	0	0	0	0	0	0
3	1	21	0	0	0	0	0	0
3	1	23	0	0	0	0	0	0
373	1	1	0	0	0	0	0	0
373	1	3	0	0	0	0	0	0
373	1	5	0	0	0	0	0	0
373	1	7	0	0	0	0	0	0
373	1	9	0	0	0	0	0	0
373	1	11	0	0	6	0	0	6
373	1	13	0	12	0	0	0	12
373	1	15	0	0	10	0	0	10
373	1	17	0	0	2	0	0	2
373	1	19	0	0	0	0	0	0
373	1	21	0	0	0	0	0	0
373	1	23	0	0	0	0	0	0
504	1	1	0	0	0	0	0	0
504	1	3	0	0	0	0	0	0
504	1	5	0	0	0	0	0	0
504	1	7	55	0	0	0	0	55
504	1	9	11	0	0	2	0	13
504	1	11	18	0	0	1	0	19
504	1	13	26	0	1	1	0	28
504	1	15	23	1	0	8	0	32
504	1	17	47	0	0	0	0	47
504	1	19	0	0	0	0	0	0
504	1	21	0	0	0	0	0	0
504	1	23	0	0	0	0	0	0
514	1	1	0	0	0	0	0	0
514	1	3	18	7	0	0	0	25
514	1	5	0	0	0	0	0	0
514	1	7	20	7	0	0	0	27
514	1	9	25	23	0	0	0	48
514	1	11	13	28	0	0	0	41
514	1	13	11	2	0	0	0	13
514	1	15	46	15	4	0	0	65
514	1	17	41	2	0	0	0	43
514	1	19	0	0	0	0	0	0
514	1	21	0	0	0	0	0	0
514	1	23	0	0	0	0	0	0
515	1	1	0	0	0	0	0	0
515	1	3	0	0	0	0	0	0
515	1	5	0	0	0	0	0	0
515	1	7	0	0	0	0	3	3
515	1	9	0	0	0	0	5	5
515	1	11	0	0	0	0	9	9
515	1	13	0	0	0	0	5	5
515	1	15	0	0	0	0	5	5
515	1	17	0	0	0	0	3	3
515	1	19	0	0	0	0	1	1
515	1	21	0	0	0	0	0	0
515	1	23	0	0	0	0	0	0
808	1	1	0	0	0	0	0	0
808	1	3	0	0	0	0	0	0
808	1	5	0	0	0	0	0	0
808	1	7	0	0	0	0	0	0
808	1	9	0	0	0	0	0	0
808	1	11	0	0	0	0	0	0
808	1	13	0	0	1	0	0	1
808	1	15	17	0	42	0	0	59
808	1	17	0	0	0	0	0	0
808	1	19	0	0	0	0	0	0
808	1	21	0	0	0	0	0	0
808	1	23	0	0	0	0	0	0
3	2	1	0	0	0	0	0	0
3	2	3	0	0	0	0	0	0
3	2	5	0	0	0	0	0	0
3	2	7	0	0	0	0	0	0
3	2	9	0	0	0	0	0	0
3	2	11	0	0	0	0	0	0
3	2	13	0	0	0	0	0	0
3	2	15	0	0	0	0	0	0
3	2	17	0	0	0	0	0	0
3	2	19	0	0	0	0	0	0
3	2	21	0	0	0	0	0	0
3	2	23	0	0	0	0	0	0
373	2	1	0	0	0	0	0	0
373	2	3	0	0	0	0	0	0
373	2	5	0	0	0	0	0	0
373	2	7	0	0	0	0	0	0
373	2	9	0	0	0	0	0	0
373	2	11	0	0	0	0	0	0
373	2	13	0	0	0	0	0	0
373	2	15	0	0	0	0	0	0
373	2	17	0	0	0	0	0	0
373	2	19	0	0	0	0	0	0
373	2	21	0	0	0	0	0	0
373	2	23	0	0	0	0	0	0
504	2	1	0	0	0	0	0	0
504	2	3	0	0	0	0	0	0
504	2	5	34	0	0	1	0	35
504	2	7	53	1	0	4	0	58
504	2	9	9	2	0	6	0	17
504	2	11	5	0	0	1	0	6
504	2	13	38	0	0	0	0	38
504	2	15	52	5	0	4	0	61
504	2	17	39	7	0	8	0	54
504	2	19	0	0	0	0	0	0
504	2	21	0	0	0	0	0	0
504	2	23	0	0	0	0	0	0
514	2	1	7	7	0	0	0	14
514	2	3	0	0	0	0	0	0
514	2	5	0	0	0	0	0	0
514	2	7	27	3	0	0	0	30
514	2	9	30	18	0	0	0	48
514	2	11	25	0	0	0	0	25
514	2	13	15	0	0	0	0	15
514	2	15	28	28	0	0	0	56
514	2	17	20	13	0	0	0	33
514	2	19	0	0	0	0	0	0
514	2	21	0	0	0	0	0	0
514	2	23	0	0	0	0	0	0
515	2	1	0	0	0	0	2	2
515	2	3	0	0	0	0	0	0
515	2	5	0	0	0	0	0	0
515	2	7	0	0	0	0	9	9
515	2	9	0	0	0	0	7	7
515	2	11	2	0	0	0	6	8
515	2	13	2	0	0	0	1	3
515	2	15	0	0	0	0	4	4
515	2	17	0	0	0	0	7	7
515	2	19	0	0	0	0	2	2
515	2	21	0	0	0	0	0	0
515	2	23	0	0	0	0	0	0
808	2	1	0	0	0	0	0	0
808	2	3	0	0	0	0	0	0
808	2	5	0	0	0	0	0	0
808	2	7	3	0	6	0	0	9
808	2	9	0	0	0	0	0	0
808	2	11	0	0	2	0	0	2
808	2	13	0	0	9	0	0	9
808	2	15	0	0	0	0	0	0
808	2	17	0	0	0	0	0	0
808	2	19	0	0	0	0	0	0
808	2	21	5	0	0	0	0	5
808	2	23	0	0	0	0	0	0

## Sheet: cortisol
Camel	Day	Hour	Cortisol
3	Day1	14	19
3	Day1	16	17
3	Day1	18	16.25
3	Day1	20	27
3	Day1	22	21.5
3	Day1	24	25.5
3	Day1	2	31
3	Day1	4	18.5
3	Day1	6	21.5
3	Day1	8	18.5
3	Day1	10	33.75
3	Day1	12	25.5
373	Day1	14	31
373	Day1	16	36.5
373	Day1	18	28.25
373	Day1	20	18.5
373	Day1	22	20
373	Day1	24	25.5
373	Day1	2	40.5
373	Day1	4	33.75
373	Day1	6	36.5
373	Day1	8	27
373	Day1	10	33
373	Day1	12	31
504	Day1	14	18.5
504	Day1	16	17.5
504	Day1	18	18
504	Day1	20	16.25
504	Day1	22	14.75
504	Day1	24	15.5
504	Day1	2	18
504	Day1	4	17.5
504	Day1	6	18.5
504	Day1	8	28.25
504	Day1	10	23
504	Day1	12	31
514	Day1	14	16.25
514	Day1	16	18.5
514	Day1	18	19
514	Day1	20	18
514	Day1	22	16.25
514	Day1	24	16.25
514	Day1	2	18
514	Day1	4	25.5
514	Day1	6	16.75
514	Day1	8	20
514	Day1	10	18
514	Day1	12	21.5
515	Day1	14	18
515	Day1	16	18
515	Day1	18	17.5
515	Day1	20	15.25
515	Day1	22	16.25
515	Day1	24	14.75
515	Day1	2	17.5
515	Day1	4	17.5
515	Day1	6	18
515	Day1	8	18
515	Day1	10	34.75
515	Day1	12	25.5
808	Day1	14	23
808	Day1	16	19
808	Day1	18	16.75
808	Day1	20	16
808	Day1	22	20
808	Day1	24	21.5
808	Day1	2	19
808	Day1	4	23
808	Day1	6	29.75
808	Day1	8	24.25
808	Day1	10	24.25
808	Day1	12	24.25
3	Day2	14	29.75
3	Day2	16	31
3	Day2	18	13.5
3	Day2	20	6.25
3	Day2	22	11.25
3	Day2	24	13.5
3	Day2	2	5
3	Day2	4	12.5
3	Day2	6	14.75
3	Day2	8	9.5
3	Day2	10	9.75
3	Day2	12	11.25
373	Day2	14	36.5
373	Day2	16	23
373	Day2	18	34.75
373	Day2	20	13.5
373	Day2	22	17.5
373	Day2	24	14.5
373	Day2	2	16
373	Day2	4	17
373	Day2	6	23
373	Day2	8	16.25
373	Day2	10	14.75
373	Day2	12	14
504	Day2	14	24.25
504	Day2	16	27
504	Day2	18	28.25
504	Day2	20	5.75
504	Day2	22	6.25
504	Day2	24	12.5
504	Day2	2	9.75
504	Day2	4	12
504	Day2	6	16
504	Day2	8	15.5
504	Day2	10	10.5
504	Day2	12	9.75
514	Day2	14	19
514	Day2	16	21.5
514	Day2	18	19
514	Day2	20	5.75
514	Day2	22	8.5
514	Day2	24	11.25
514	Day2	2	10.5
514	Day2	4	9.5
514	Day2	6	11.75
514	Day2	8	10
514	Day2	10	9
514	Day2	12	11.25
515	Day2	14	27
515	Day2	16	24.25
515	Day2	18	28.25
515	Day2	20	7.75
515	Day2	22	4.25
515	Day2	24	7
515	Day2	2	11.25
515	Day2	4	5.5
515	Day2	6	11.25
515	Day2	8	14.5
515	Day2	10	7.5
515	Day2	12	8.5
808	Day2	14	38
808	Day2	16	24.25
808	Day2	18	27
808	Day2	20	9
808	Day2	22	9
808	Day2	24	8.5
808	Day2	2	11
808	Day2	4	9.75
808	Day2	6	16
808	Day2	8	15.5
808	Day2	10	11
808	Day2	12	13.5

## Sheet: Testosterone
Camel	Day	Time	Rep	Testo
504	1	14h	1	1.19
504	1	14h	2	1.25
504	1	16h	1	1.41
504	1	16h	2	1.44
504	1	18h	1	3.17
504	1	18h	2	3.29
504	1	20h	1	2.69
504	1	20h	2	2.74
504	1	22h	1	1.77
504	1	22h	2	1.69
504	1	24h	1	7.07
504	1	24h	2	6.74
504	1	02h	1	3.66
504	1	02h	2	3.69
504	1	04h	1	0.74
504	1	04h	2	0.73
504	1	06h	1	0.45
504	1	06h	2	0.45
504	1	08h	1	0.5
504	1	08h	2	0.51
504	1	10h	1	11.67
504	1	10h	2	11.09
504	1	12h	1	14.49
504	1	12h	2	13.75
373	1	14h	1	1.26
373	1	14h	2	1.29
373	1	16h	1	2.39
373	1	16h	2	2.55
373	1	18h	1	4.17
373	1	18h	2	3.96
373	1	20h	1	11.56
373	1	20h	2	11.82
373	1	22h	1	13.01
373	1	22h	2	12.99
373	1	24h	1	9.03
373	1	24h	2	9.25
373	1	02h	1	4.32
373	1	02h	2	4.4
373	1	04h	1	3.86
373	1	04h	2	4.04
373	1	06h	1	4.06
373	1	06h	2	4.17
373	1	08h	1	3.96
373	1	08h	2	3.95
373	1	10h	1	3.64
373	1	10h	2	3.41
373	1	12h	1	1.47
373	1	12h	2	1.49
808	1	14h	1	0.76
808	1	14h	2	0.8
808	1	16h	1	0.83
808	1	16h	2	0.83
808	1	18h	1	1.97
808	1	18h	2	2.16
808	1	20h	1	2.04
808	1	20h	2	2.1
808	1	22h	1	0.35
808	1	22h	2	0.38
808	1	24h	1	0.16
808	1	24h	2	0.17
808	1	02h	1	1.72
808	1	02h	2	1.78
808	1	04h	1	0.53
808	1	04h	2	0.58
808	1	06h	1	0.4
808	1	06h	2	0.43
808	1	08h	1	0.51
808	1	08h	2	0.48
808	1	10h	1	1.02
808	1	10h	2	1.03
808	1	12h	1	5.29
808	1	12h	2	5.55
3	1	14h	1	1.58
3	1	14h	2	1.53
3	1	16h	1	0.06
3	1	16h	2	0.06
3	1	18h	1	1.22
3	1	18h	2	1.2
3	1	20h	1	5.41
3	1	20h	2	5.08
3	1	22h	1	3.38
3	1	22h	2	3.39
3	1	24h	1	1.15
3	1	24h	2	1.18
3	1	02h	1	2.47
3	1	02h	2	2.41
3	1	04h	1	0.8
3	1	04h	2	0.81
3	1	06h	1	1.52
3	1	06h	2	1.43
3	1	08h	1	1.39
3	1	08h	2	1.44
3	1	10h	1	14.33
3	1	10h	2	14.22
3	1	12h	1	3.85
3	1	12h	2	3.59
515	1	14h	1	14.85
515	1	14h	2	14.22
515	1	16h	1	26.6
515	1	16h	2	27.56
515	1	18h	1	26.64
515	1	18h	2	24.68
515	1	20h	1	16.31
515	1	20h	2	15.87
515	1	22h	1	16.3
515	1	22h	2	15.86
515	1	24h	1	16.03
515	1	24h	2	16.45
515	1	02h	1	19.6
515	1	02h	2	19.08
515	1	04h	1	19.32
515	1	04h	2	19.32
515	1	06h	1	17.03
515	1	06h	2	17.28
515	1	08h	1	34.96
515	1	08h	2	33.68
515	1	10h	1	32.96
515	1	10h	2	35.92
515	1	12h	1	20.56
515	1	12h	2	20.12
514	1	14h	1	10.33
514	1	14h	2	10.88
514	1	16h	1	3.76
514	1	16h	2	3.74
514	1	18h	1	15.85
514	1	18h	2	15.81
514	1	20h	1	14.93
514	1	20h	2	14.2
514	1	22h	1	10.99
514	1	22h	2	10.43
514	1	24h	1	10.89
514	1	24h	2	10.9
514	1	02h	1	6.84
514	1	02h	2	6.72
514	1	04h	1	11.7
514	1	04h	2	11.05
514	1	06h	1	15.81
514	1	06h	2	14.67
514	1	08h	1	10.31
514	1	08h	2	10.09
514	1	10h	1	8.37
514	1	10h	2	8.98
514	1	12h	1	16.2
514	1	12h	2	16.63
504	2	14h	1	7.96
504	2	14h	2	8.53
504	2	16h	1	12.75
504	2	16h	2	13.29
504	2	18h	1	12.96
504	2	18h	2	13.08
504	2	20h	1	10.64
504	2	20h	2	10.83
504	2	22h	1	11.77
504	2	22h	2	12.21
504	2	24h	1	14.84
504	2	24h	2	13.55
504	2	02h	1	13.43
504	2	02h	2	14.02
504	2	04h	1	8.32
504	2	04h	2	8.15
504	2	06h	1	5.69
504	2	06h	2	5.71
504	2	08h	1	6.9
504	2	08h	2	7.04
504	2	10h	1	13.39
504	2	10h	2	13.14
504	2	12h	1	7.85
504	2	12h	2	8.21
373	2	14h	1	2.26
373	2	14h	2	2.24
373	2	16h	1	5.73
373	2	16h	2	5.87
373	2	18h	1	14.56
373	2	18h	2	14.45
373	2	20h	1	5.6
373	2	20h	2	5.71
373	2	22h	1	7.29
373	2	22h	2	7.71
373	2	24h	1	8.34
373	2	24h	2	7.88
373	2	02h	1	3.49
373	2	02h	2	3.35
373	2	04h	1	5.42
373	2	04h	2	5.56
373	2	06h	1	7.3
373	2	06h	2	7.59
373	2	08h	1	4.61
373	2	08h	2	4.46
373	2	10h	1	3.92
373	2	10h	2	3.88
373	2	12h	1	1.45
373	2	12h	2	1.42
808	2	14h	1	1.26
808	2	14h	2	1.22
808	2	16h	1	1.15
808	2	16h	2	1.14
808	2	18h	1	1.9
808	2	18h	2	1.96
808	2	20h	1	1.45
808	2	20h	2	1.43
808	2	22h	1	0.53
808	2	22h	2	0.57
808	2	24h	1	0.59
808	2	24h	2	0.62
808	2	02h	1	2.42
808	2	02h	2	2.32
808	2	04h	1	0.85
808	2	04h	2	0.91
808	2	06h	1	2.02
808	2	06h	2	1.98
808	2	08h	1	1.66
808	2	08h	2	1.64
808	2	10h	1	1.44
808	2	10h	2	1.45
808	2	12h	1	1.07
808	2	12h	2	1.11
3	2	14h	1	2.16
3	2	14h	2	2.32
3	2	16h	1	0.89
3	2	16h	2	0.88
3	2	18h	1	7.41
3	2	18h	2	7.78
3	2	20h	1	3.77
3	2	20h	2	3.86
3	2	22h	1	1.91
3	2	22h	2	2.03
3	2	24h	1	0.84
3	2	24h	2	0.85
3	2	02h	1	2.24
3	2	02h	2	2.32
3	2	04h	1	2.08
3	2	04h	2	2.09
3	2	06h	1	7.4
3	2	06h	2	7.31
3	2	08h	1	6.33
3	2	08h	2	6.21
3	2	10h	1	5.17
3	2	10h	2	5.1
3	2	12h	1	1.7
3	2	12h	2	1.71
515	2	14h	1	16.84
515	2	14h	2	17.92
515	2	16h	1	37.04
515	2	16h	2	36.6
515	2	18h	1	14.4
515	2	18h	2	13.56
515	2	20h	1	20.08
515	2	20h	2	19.96
515	2	22h	1	27.52
515	2	22h	2	27.52
515	2	24h	1	31.32
515	2	24h	2	31.2
515	2	02h	1	21.4
515	2	02h	2	23.2
515	2	04h	1	19.12
515	2	04h	2	18.64
515	2	06h	1	18.96
515	2	06h	2	19.52
515	2	08h	1	33.8
515	2	08h	2	35.96
515	2	10h	1	22.28
515	2	10h	2	24.08
515	2	12h	1	27.44
515	2	12h	2	27.4
514	2	14h	1	17.16
514	2	14h	2	17.24
514	2	16h	1	11.43
514	2	16h	2	11.26
514	2	18h	1	11.88
514	2	18h	2	12.2
514	2	20h	1	13.65
514	2	20h	2	14.05
514	2	22h	1	17.64
514	2	22h	2	17.32
514	2	24h	1	15.52
514	2	24h	2	15.72
514	2	02h	1	18.16
514	2	02h	2	17.76
514	2	04h	1	15.16
514	2	04h	2	15.88
514	2	06h	1	11.99
514	2	06h	2	10.3
514	2	08h	1	19.84
514	2	08h	2	19.44
514	2	10h	1	20.44
514	2	10h	2	20.76
514	2	12h	1	15.43
514	2	12h	2	16.22
